# Supplementary material for: Neglect of Temperature and pH Impact Leads to Underestimation of Seasonal Ecological Risk of Ammonia in Chinese Surface Freshwaters
Source: Hindawi journal article supplement (doi:10.1155/2019/3051398), 2019-09-29
Supplement: f1 [file 3051398.f1.xlsx]

## Sheet: Table S1
Species	Species category	pH	Temp. (℃)	LC50 or EC50 (mg TAN/L)	TAN adjusted to pH 7 (all organisms) and 20℃ (invertebtates) (mg/L)	Reference		Species	Species category	Test and chronic effect	pH	Temp. (℃)	TAN (mg/L)	TAN adjusted to pH 7 (all organisms) and 20℃ (invertebtates) (mg/L)	Reference
Monopterus albus	Fish	7	28	3478	3478	IP et al., 2004		Pteronarcella badia	Insect	30-d Juv Survival	8.04	12.1	133.8	207	Thurston et al., 1984b
Erythromma najas	Insect	7.5	25	589	1618	Beketov, 2002		Pteronarcella badia	Insect	30-d Juv Survival	7.81	13.2	21.66	26.27	Thurston et al., 1984b
Erythromma najas	Insect	8.7	25	168	4163	Beketov, 2002		Daphnia magna	Crustacea	21-d LC Reproduction	8.45	19.8	7.37	36.27	Gersich et al., 1985
Erythromma najas	Insect	9.1	25	49.2	2361	Beketov, 2002		Daphnia magna	Crustacea	21-d LC Reproduction	7.92	20.1	21.7	47.4	Reinbold and Pescitelli, 1982a
Philarctus quaeris	Insect	7.8	21.9	296.5	1032	Arthur et al., 1987		Ctenopharyngodon idellus	Fish	45-d Juv Biomass	7.3	27.1	13.44	18.5	Zhou et al., 1986
Philarctus quaeris	Insect	7.8	13.1	561.7	958.4	Arthur et al., 1987		Hyalella azteca	Amphipod	28-d PLC Biomass	8.04	25	8.207	29.17	Borgmann, 1994
Stenelmis sexlineata	Insect	8.7	25	29.7	735.9	Hazel et al., 1979		Ictalurus punctatus	Fish	30-d ELS Weight	7.8	25.8	12.2	22.66	Reinbold and Pescitelli, 1982a
Orconectes immunis	Fish	7.9	17.1	488.1	1367	Arthur et al., 1987		Ictalurus punctatus	Fish	30-d Juv Survival	8.35	27.9	5.02	21.15	Colt and Tchobanoglous, 1978
Orconectes immunis	Fish	8.2	4.6	999.4	1757	Arthur et al., 1987		Ictalurus punctatus	Fish	30-d ELS Biomass	7.76	26.9	11.5	20.35	Swigert and Spacie, 1983
Orconectes nais	Fish	8.3	26.5	23.15	303.8	Evas, 1979		Esox lucius	Fish	52-d ELS Biomass	7.62	8.7	13.44	20.38	Harrahy et al., 2004
Chironomus riparius	Insect	7.7	21.7	357.7	1029	Monda et al., 1995		Cyprinus carpio	Fish	28-d ELS Weight	7.85	23	8.36	16.53	Mallet and Sims, 1994
Chironomus tentans	Insect	6.5	25	371	415.1	Schubauer-Berigan et al., 1995		Oncorhynchus clarkii	Fish	103-d ELS Survival	7.57	13.7	17.89	25.83	Koch et al., 1980
Chironomus tentans	Insect	8.1	25	78.1	614	Schubauer-Berigan et al., 1995		Oncorhynchus mykiss	Fish	42-d ELS Survival	7.5	10	33.6	45.5	Burkhalter and Kaya, 1977
Chironomus tentans	Insect	6.5	25	368	411.7	Schubauer-Berigan et al., 1995		Oncorhynchus mykiss	Fish	72-d ELS Survival	7.4	14.5	2.6	3.246	Calamari et al., 1977
Chironomus tentans	Insect	8.1	25	50.5	397	Schubauer-Berigan et al., 1995		Oncorhynchus mykiss	Fish	73-d ELS Survival	7.52	14.9	2.55	3.515	Solbe and Shurben, 1989
Drunella grandis	Insect	7.84	12.8	259.1	455.5	Thurston et al., 1984a		Oncorhynchus mykiss	Fish	5-year LC	7.7	9	6.71	11.08	Thurston et al., 1984a
Drunella grandis	Insect	7.84	13.2	195.6	355.6	Thurston et al., 1984a		Oncorhynchus mykiss	Fish	90-d ELS Survival	7.75	11.4	8.919	15.6	Brinkman et al., 2009
Drunella grandis	Insect	7.85	12	319	534.5	Thurston et al., 1984a		Oncorhynchus nerka	Fish	62-d Embryos Hatchability	8.42	10	2.13	10.09	Rankin, 1979
Caecidotea racovitzai	Crustacea	7.8	22	148.8	522.3	Arthur et al., 1987		Catostomus commersonii	Fish	30-d ELS Biomass	8.32	18.6	2.9	11.62	Reinbold and Pescitelli, 1982a
Caecidotea racovitzai	Crustacea	8	4	357.8	407.7	Arthur et al., 1987		Micropterus dolomieu	Fish	32-d ELS Biomass	6.6	22.3	9.61	8.65	Broderius et al., 1985
Caecidotea racovitzai	Crustacea	7.81	11.9	176	272.2	Thurston et al., 1983		Micropterus dolomieu	Fish	32-d ELS Biomass	7.25	22.3	8.62	9.726	Broderius et al., 1985
Gasterosteus aculeatus	Fish	7.1	23.3	198.1	216.5	Hazel et al., 1971		Micropterus dolomieu	Fish	32-d ELS Biomass	7.83	22.3	8.18	15.77	Broderius et al., 1985
Gasterosteus aculeatus	Fish	7.15	15	577	667.4	Hazel et al., 1971		Micropterus dolomieu	Fish	32-d ELS Biomass	8.68	22.3	1.54	11.31	Broderius et al., 1985
Gasterosteus aculeatus	Fish	7.25	23.3	203.8	264	Hazel et al., 1971		Pimephales promelas	Fish	28-d ELS Survival	8	24.8	5.12	12.43	Mayes et al., 1986
Gasterosteus aculeatus	Fish	7.5	15	143.9	261.1	Hazel et al., 1971		Pimephales promelas	Fish	32-d ELS Biomass	7.95	25.5	7.457	16.87	Adelman et al., 2009
Gasterosteus aculeatus	Fish	7.5	23.3	78.7	142.8	Hazel et al., 1971		Pimephales promelas	Fish	30-d ELS Biomass	7.82	25.1	3.73	7.101	Swigert and Spacie, 1983
Gasterosteus aculeatus	Fish	7.5	23.3	115.4	209.5	Hazel et al., 1971		Pimephales promelas	Fish	LC Hatchability	8	24.2	1.97	4.784	Thurston et al., 1986
Gasterosteus aculeatus	Fish	7.5	15	259	470	Hazel et al., 1971		Fluminicola sp.	Mollusk	28-d Juv Change in Length	8.22	20.1	2.281	7.828	Besser, 2011
Callibaetis skokianus	Insect	7.7	10.8	263.5	307.2	Arthur et al., 1987		Musculium transversum	Mollusk	42-d Juv Survival	8.15	23.5	5.82	22.21	Anderson et al., 1978
Callibaetis skokianus	Insect	7.9	13.3	211.7	432.7	Arthur et al., 1987		Musculium transversum	Mollusk	42-d Juv Survival	7.8	21.8	1.23	2.565	Sparks and Sandusky, 1981
Callibaetis sp.	Insect	7.81	11.9	107.8	166.7	Thurston et al., 1984b		Lepomis cyanellus	Fish	30-d ELS Biomass	7.9	22	5.61	11.85	McCormick et al., 1984
Pachydiplax longipennis	Insect	8	12	76.92	170.1	Diamond et al., 1993		Lepomis cyanellus	Fish	30-d ELS Survival	8.16	25.4	5.84	18.06	Reinbold and Pescitelli, 1982a
Pachydiplax longipennis	Insect	8	20	74.37	319.2	Diamond et al., 1993		Lepomis macrochirus	Fish	30-d ELS Biomass	7.76	22.5	1.85	3.273	Smith et al., 1984
Cottus bairdii	Fish	8.02	12.4	49.83	222.2	Thurston and Russo, 1981		Villosa iris	Mollusk	28-d Juv Survival	8.2	20	1.063	3.501	Wang et al., 2007a
Gambusia affinis	Fish	7.75	19	129.6	352.9	Wallen et al, 1957		Lampsilis siliquoidea	Mollusk	28-d Juv Survival	8.25	20	0.8988	3.211	Wang et al., 2011
Gambusia affinis	Fish	8.2	19.5	34.54	217.7	Wallen et al, 1957		Lampsilis fasciola	Mollusk	28-d Juv Survival	8.2	20	0.4272	1.408	Wang et al., 2007a
Gambusia affinis	Fish	8.5	23	14.64	165	Wallen et al, 1957
Gambusia affinis	Fish	8	24	42.53	182.6	Wallen et al, 1957
Lumbriculus variegatus	Annelid	6.5	25	100	111.9	Schubauer-Berigan et al., 1995
Lumbriculus variegatus	Annelid	6.5	25	200	223.8	Schubauer-Berigan et al., 1995
Lumbriculus variegatus	Annelid	8.1	25	34	267.3	Schubauer-Berigan et al., 1995
Lumbriculus variegatus	Annelid	8.1	25	43.5	342	Schubauer-Berigan et al., 1995
Tubifex tubifex	Annelid	8.2	12	66.67	216.5	Stammer, 1953
Anguilla anguilla	Fish	7.5	23	110.6	200.686	Sadler, 1981
Anguilla anguilla	Fish	7.5	23	136.6	247.863	Sadler, 1981
Anguilla anguilla	Fish	7.44	20	166.7	277.05	Pan et al., 1998
Planorbella trivolvis	Mollusk	7.9	22	47.73	200.7	Arthur et al., 1987
Planorbella trivolvis	Mollusk	8.2	12.9	63.73	223	Arthur et al., 1987
Gobiocypris rarus	Fish	7.49	24	113	202	Yan et al., 2010
Hyalella azteca	Crustacea	8.3	25	39.8	461.2	Ankley et al., 1995
Hyalella azteca	Crustacea	7.31	25	64	135.1	Ankley et al., 1995
Hyalella azteca	Crustacea	6.43	25	105	114.6	Ankley et al., 1995
Skwala americana	Insect	7.81	13.1	109.3	186.7	Thurston et al., 1984b
Skwala americana	Insect	7.76	13.8	119.6	198.3	Thurston et al., 1984b
Oreochromis mossambicus	Fish	7.2	28	151.5	185.2	Rani et al., 1998
Crangonyx pseudogracilis	Amphipod	8	4	199.5	227.3	Arthur et al., 1987
Crangonyx pseudogracilis	Amphipod	8	12.1	216	481.7	Arthur et al., 1987
Crangonyx pseudogracilis	Amphipod	8	13.3	115.3	284.1	Arthur et al., 1987
Crangonyx pseudogracilis	Amphipod	8	24.9	25.1	161.7	Arthur et al., 1987
Crangonyx pseudogracilis	Amphipod	8.2	13	81.6	287.9	Arthur et al., 1987
Crangonyx sp.	Amphipod	8	12	79.23	175.3	Diamond et al., 1993
Crangonyx sp.	Amphipod	8	20	19.83	85.13	Diamond et al., 1993
Limnodrilus hoffineisteri	Annelid	7.9	11.5	96.62	170.2	Williams et al., 1986
Physa gyrina	Mollusk	8	4	114.9	131	Arthur et al., 1987
Physa gyrina	Mollusk	8.2	5.5	85.13	161.3	Arthur et al., 1987
Physa gyrina	Mollusk	8.1	12.1	76.29	205.9	Arthur et al., 1987
Physa gyrina	Mollusk	8.2	12.8	50.25	174.4	Arthur et al., 1987
Physa gyrina	Mollusk	8	13.3	62.39	153.7	Arthur et al., 1987
Physa gyrina	Mollusk	8	24.9	26.33	169.7	Arthur et al., 1987
Enallagma sp.	Insect	7.9	11.5	93.1	164	Williams et al., 1986
Chydorus sphaericus	Crustacea	8	20	37.88	162.6	Dekker et al., 2006
Pimephales promelas	Fish	7.9	3.4	229.7	818.4	Arthur et al., 1987
Pimephales promelas	Fish	8.1	12.1	56.07	291.3	Arthur et al., 1987
Pimephales promelas	Fish	8	17.1	52.22	224.2	Arthur et al., 1987
Pimephales promelas	Fish	8.1	26.1	29.23	151.8	Arthur et al., 1987
Pimephales promelas	Fish	8.05	14	47.29	223.2	DeGraeve et al., 1980
Pimephales promelas	Fish	7.46	6	97.27	166.4	DeGraeve et al., 1987
Pimephales promelas	Fish	7.46	10	101.7	174	DeGraeve et al., 1987
Pimephales promelas	Fish	7.41	15	76.58	122	DeGraeve et al., 1987
Pimephales promelas	Fish	7.41	20	78.22	124.6	DeGraeve et al., 1987
Pimephales promelas	Fish	7.45	20	66.94	112.9	DeGraeve et al., 1987
Pimephales promelas	Fish	7.4	25	81.81	128.5	DeGraeve et al., 1987
Pimephales promelas	Fish	7.41	25	91.4	145.6	DeGraeve et al., 1987
Pimephales promelas	Fish	7.44	30	64.12	106.6	DeGraeve et al., 1987
Pimephales promelas	Fish	8.14	22	25.16	141.2	Mayes et al., 1986
Pimephales promelas	Fish	7.9	20.6	28.9	103	Nimmo et al., 1989
Pimephales promelas	Fish	8.2	6.2	7.322	46.15	Nimmo et al., 1989
Pimephales promelas	Fish	7.8	20.1	18.73	55.68	Nimmo et al., 1989
Pimephales promelas	Fish	7.8	19.8	32.12	95.49	Nimmo et al., 1989
Pimephales promelas	Fish	8.1	19.6	24.89	129.3	Nimmo et al., 1989
Pimephales promelas	Fish	8.2	6.2	11.56	72.86	Nimmo et al., 1989
Pimephales promelas	Fish	8.1	5.8	19.94	103.6	Nimmo et al., 1989
Pimephales promelas	Fish	8.1	5.8	21.44	111.4	Nimmo et al., 1989
Pimephales promelas	Fish	7.7	20.1	32.25	80.61	Nimmo et al., 1989
Pimephales promelas	Fish	8.46	4.1	18.54	193.5	Reinbold and Pescitelli, 1982b
Pimephales promelas	Fish	8.02	23.9	19.55	87.16	Reinbold and Pescitelli, 1982b
Pimephales promelas	Fish	8.26	4.6	30.57	216.5	Reinbold and Pescitelli, 1982b
Pimephales promelas	Fish	8.16	25.2	17.65	102.9	Reinbold and Pescitelli, 1982b
Pimephales promelas	Fish	7.7	21.65	63.02	157.5	Sparks, 1975
Pimephales promelas	Fish	7.78	25.9	40.85	117.3	Swigert and Spacie, 1983
Pimephales promelas	Fish	7.8	25.6	42.65	126.8	Swigert and Spacie, 1983
Pimephales promelas	Fish	7.83	11.8	45.71	143.3	Thurston et al, 1981c
Pimephales promelas	Fish	7.82	12	62.72	193.3	Thurston et al, 1981c
Pimephales promelas	Fish	6.51	13	260	192.9	Thurston et al, 1981c
Pimephales promelas	Fish	9.03	13.2	5.94	169.6	Thurston et al, 1981c
Pimephales promelas	Fish	8.51	13.5	18.88	216.9	Thurston et al, 1981c
Pimephales promelas	Fish	7.01	13.8	145.9	147.2	Thurston et al, 1981c
Pimephales promelas	Fish	7.91	16.3	51.55	187.1	Thurston et al, 1981c
Pimephales promelas	Fish	7.89	13.1	50.2	175.6	Thurston et al, 1981c
Pimephales promelas	Fish	7.64	13.6	58.4	132.1	Thurston et al, 1981c
Pimephales promelas	Fish	7.68	13.5	64.7	156.3	Thurston et al, 1981c
Pimephales promelas	Fish	8.03	22.1	47.6	216.3	Thurston et al, 1981c
Pimephales promelas	Fish	8.06	22	42.6	205	Thurston et al, 1981c
Pimephales promelas	Fish	7.67	13.9	58.8	139.7	Thurston et al, 1981c
Pimephales promelas	Fish	8.05	13	74.65	352.4	Thurston et al, 1981c
Pimephales promelas	Fish	8.05	13.6	66.48	313.8	Thurston et al, 1981c
Pimephales promelas	Fish	7.94	19.1	42.3	162.3	Thurston et al, 1981c
Pimephales promelas	Fish	7.76	19	50.28	139.3	Thurston et al, 1981c
Pimephales promelas	Fish	7.66	13.4	58.2	136	Thurston et al, 1981c
Pimephales promelas	Fish	7.87	15.8	58.91	198.7	Thurston et al, 1981c
Pimephales promelas	Fish	7.83	22	50.6	158.7	Thurston et al, 1981c
Pimephales promelas	Fish	7.91	18.9	49.3	178.9	Thurston et al, 1981c
Pimephales promelas	Fish	7.77	14.3	66.7	188.1	Thurston et al, 1981c
Pimephales promelas	Fish	7.77	14.1	72.71	205.1	Thurston et al, 1981c
Pimephales promelas	Fish	8.04	22.4	36.59	169.5	Thurston et al, 1981c
Pimephales promelas	Fish	8.08	21.4	44.8	224	Thurston et al, 1981c
Pimephales promelas	Fish	8.16	21.4	47.39	276.4	Thurston et al, 1981c
Pimephales promelas	Fish	7.88	21.7	50.9	174.8	Thurston et al, 1981c
Pimephales promelas	Fish	7.68	12.9	91.8	221.8	Thurston et al, 1981c
Pimephales promelas	Fish	7.63	13.2	89.85	199.9	Thurston et al, 1981c
Pimephales promelas	Fish	7.76	12.9	107.5	298	Thurston et al, 1981c
Pimephales promelas	Fish	7.84	21.7	55.43	177	Thurston et al, 1981c
Pimephales promelas	Fish	7.76	13.1	66.73	184.9	Thurston et al, 1981c
Pimephales promelas	Fish	7.74	12.8	52.2	139.7	Thurston et al, 1981c
Pimephales promelas	Fish	7.91	15.9	47.43	172.1	Thurston et al, 1981c
Salvelinus fontinalis	Fish	7.86	13.6	45.21	149.7	Thurston and Meyn, 1984
Salvelinus fontinalis	Fish	7.83	13.8	52.03	163.2	Thurston and Meyn, 1984
Salvelinus namaycush	Fish	7.45	8.5	90.43	152.5	Soderberg and Meade, 1992
Salvelinus namaycush	Fish	7.45	8.5	110.2	185.9	Soderberg and Meade, 1992
Salvelinus namaycush	Fish	7.45	8.5	96.25	162.3	Soderberg and Meade, 1992
Salvelinus namaycush	Fish	7.45	8.5	83.11	140.1	Soderberg and Meade, 1992
Catostomus commersonii	Fish	7.8	3.6	89.57	266.3	Arthur et al., 1987
Catostomus commersonii	Fish	8.1	11.3	60.86	316.1	Arthur et al., 1987
Catostomus commersonii	Fish	8.2	12.6	40.85	257.4	Arthur et al., 1987
Catostomus commersonii	Fish	8.2	15.3	43.01	271	Arthur et al., 1987
Catostomus commersonii	Fish	7.8	20.2	31.21	92.8	Nimmo et al., 1989
Catostomus commersonii	Fish	7.8	20.2	18.93	56.28	Nimmo et al., 1989
Catostomus commersonii	Fish	8.16	15	30.28	176.6	Reinbold and Pescitelli, 1982c
Catostomus commersonii	Fish	8.14	15.4	29.65	166.3	Reinbold and Pescitelli, 1982c
Catostomus commersonii	Fish	7.8	22.5	22.3	66.32	Swigert and Spacie, 1983
Catostomus platyrhynchus	Fish	7.67	12	66.91	159	Thurston and Meyn, 1984
Catostomus platyrhynchus	Fish	7.69	13.2	47.59	117	Thurston and Meyn, 1984
Catostomus platyrhynchus	Fish	7.73	11.7	51.62	135.8	Thurston and Meyn, 1984
Ceriodaphnia acanthina	Crustacea	7.06	24	104.8	154.3	Mount, 1982
Ceriodaphnia dubia	Crustacea	8.02	24.8	21.26	141.1	Andersen and Buckley, 1998
Ceriodaphnia dubia	Crustacea	7.5	25	47.05	129.2	Bailey et al., 2001
Ceriodaphnia dubia	Crustacea	7.5	25	56.84	156.1	Bailey et al., 2001
Ceriodaphnia dubia	Crustacea	8.16	22	24.77	170.5	Black, 2001
Ceriodaphnia dubia	Crustacea	8.4	23	28.06	334.5	Black, 2001
Ceriodaphnia dubia	Crustacea	8.4	23	32.63	389	Black, 2001
Ceriodaphnia dubia	Crustacea	8	25	14.52	94.35	Scheller, 1997
Ceriodaphnia dubia	Crustacea	8.08	24.75	15.6	114.5	Andersen and Buckley, 1998
Ceriodaphnia dubia	Crustacea	8.4	26.4	7.412	117.1	Cowgill and Milazzo, 1991
Ceriodaphnia dubia	Crustacea	7.4	23	48.59	97.89	Manning et al., 1996
Ceriodaphnia dubia	Crustacea	7.8	25	33.98	152.9	Nimmo et al., 1989
Ceriodaphnia dubia	Crustacea	8.2	7	16.65	35.72	Nimmo et al., 1989
Ceriodaphnia dubia	Crustacea	7.85	23	28.65	119.5	Sarda, 1994
Ceriodaphnia dubia	Crustacea	7.85	23	28.77	120	Sarda, 1994
Simocephalus vetulus	Crustacea	8.3	17	31.58	188.5	Arthur et al., 1987
Simocephalus vetulus	Crustacea	8.1	20.4	21.36	114.7	Arthur et al., 1987
Simocephalus vetulus	Crustacea	7.25	24.5	83.51	157	Mount, 1982
Simocephalus vetulus	Crustacea	7.06	24	83.51	122.9	Mount, 1982
Ictalurus punctatus	Fish	7.8	19.6	44.71	132.9	Arthur et al., 1987
Ictalurus punctatus	Fish	8	3.5	37.64	161.6	Arthur et al., 1987
Ictalurus punctatus	Fish	8.1	14.6	24.94	129.5	Arthur et al., 1987
Ictalurus punctatus	Fish	8.4	28	10.71	99.59	Colt and Tchobanoglous, 1978
Ictalurus punctatus	Fish	7.46	10	124.8	213.5	DeGraeve et al., 1987
Ictalurus punctatus	Fish	7.41	15	113.1	180.2	DeGraeve et al., 1987
Ictalurus punctatus	Fish	7.41	20	89.63	142.8	DeGraeve et al., 1987
Ictalurus punctatus	Fish	7.45	20	72.15	121.7	DeGraeve et al., 1987
Ictalurus punctatus	Fish	7.4	25	89.41	140.5	DeGraeve et al., 1987
Ictalurus punctatus	Fish	7.41	25	85.69	136.5	DeGraeve et al., 1987
Ictalurus punctatus	Fish	7.44	30	65.25	108.5	DeGraeve et al., 1987
Ictalurus punctatus	Fish	8	20	15.09	64.77	Diamond et al., 1993
Ictalurus punctatus	Fish	7.94	23.8	33.1	127	Reinbold and Pescitelli, 1982d
Ictalurus punctatus	Fish	7.98	23.8	30.49	126.1	Reinbold and Pescitelli, 1982d
Ictalurus punctatus	Fish	8.08	28	44.44	222.2	Roseboom and Richey, 1977
Ictalurus punctatus	Fish	8.09	22	32.33	164.8	Roseboom and Richey, 1977
Ictalurus punctatus	Fish	7.93	20	74.35	277.4	Sparks, 1975
Ictalurus punctatus	Fish	7.8	25.7	32.85	97.67	Swigert and Spacie, 1983
Ictalurus punctatus	Fish	8	26	32.34	138.8	West, 1985
Ictalurus punctatus	Fish	8.1	17	40.83	212.1	West, 1985
Procambarus clarkii	Fish	8	20	26.08	112	Diamond et al., 1993
Procambarus clarkii	Fish	8	12	76.92	170.1	Diamond et al., 1993
Salmo salar	Fish	6.4	1.8	123	87.86	Knoph, 1992
Salmo salar	Fish	6.4	1.8	133.9	95.64	Knoph, 1992
Salmo salar	Fish	6	2.1	297.2	195.1	Knoph, 1992
Salmo salar	Fish	6	2.1	341.1	223.9	Knoph, 1992
Salmo salar	Fish	6.05	2.5	400	264.4	Knoph, 1992
Salmo salar	Fish	6.05	2.5	491.7	325	Knoph, 1992
Salmo salar	Fish	6	7.3	581.5	381.7	Knoph, 1992
Salmo salar	Fish	6	7.3	587.6	385.7	Knoph, 1992
Salmo salar	Fish	6.45	7.4	171.3	124.4	Knoph, 1992
Salmo salar	Fish	6.45	7.4	214.4	155.7	Knoph, 1992
Salmo salar	Fish	6.45	12.5	230.6	167.4	Knoph, 1992
Salmo salar	Fish	6.45	12.5	248.3	180.3	Knoph, 1992
Salmo salar	Fish	6.05	12.5	403.5	266.7	Knoph, 1992
Salmo salar	Fish	6.05	12.5	451.5	298.5	Knoph, 1992
Salmo salar	Fish	6.05	17.1	356.1	235.4	Knoph, 1992
Salmo salar	Fish	6.05	17.1	373	246.6	Knoph, 1992
Salmo salar	Fish	7.45	8.5	60.29	101.7	Soderberg and Meade, 1992
Salmo salar	Fish	7.45	8.5	35.74	60.26	Soderberg and Meade, 1992
Salmo salar	Fish	7.45	8.5	118.2	199.3	Soderberg and Meade, 1992
Salmo salar	Fish	7.45	8.5	70.62	119.1	Soderberg and Meade, 1992
Salmo trutta	Fish	7.85	13.2	29.58	96.2	Thurston and Meyn, 1984
Salmo trutta	Fish	7.86	13.8	32.46	107.5	Thurston and Meyn, 1984
Salmo trutta	Fish	7.82	14.2	33.3	102.6	Thurston and Meyn, 1984
Morone americana	Fish	8	16	14.93	64.09	Stevenson, 1977
Morone americana	Fish	6	16	418.4	274.7	Stevenson, 1977
Morone chrysops	Fish	7.09	19.7	132.4	144	Ashe et al., 1996
Morone saxatilis	Fish	7.4	23.3	92.17	144.8	Hazel et al., 1971
Morone saxatilis	Fish	7.5	23.3	73.45	133.3	Hazel et al., 1971
Morone saxatilis	Fish	7.35	15	259.7	378.9	Hazel et al., 1971
Morone saxatilis	Fish	7.5	15	182.3	330.7	Hazel et al., 1971
Morone saxatilis	Fish	7.93	23.3	48.03	180.8	Hazel et al., 1971
Morone saxatilis	Fish	7.5	23.3	125.9	228.5	Hazel et al., 1971
Morone saxatilis	Fish	7.84	15	165.7	524.6	Hazel et al., 1971
Morone saxatilis	Fish	7.5	15	354.9	644	Hazel et al., 1971
Morone saxatilis	Fish	8.3	21	12.86	98.43	Oppenborn and Goudie, 1993
Oreochromis niloticus	Fish	8.1	28	16.75	86.9997	Yan et al., 2010
Oreochromis niloticus	Fish	8	28	40.4	173.42	Yan et al., 2010
Oreochromis niloticus	Fish	8.2	23	31.01	195.411	Yan et al., 2010
Oreochromis niloticus	Fish	8.2	33	18.55	116.894	Yan et al., 2010
Daphnia magna	Crustacea	8.5	20	26.34	296.9	Gersich and Hopkins, 1986
Daphnia magna	Crustacea	7.92	21	9.463	37.66	Gulyas and Fleit, 1990
Daphnia magna	Crustacea	8.2	25	20.71	197.5	Parkhurst et al., 1979
Daphnia magna	Crustacea	8.34	19.7	51.92	419.1	Reinbold and Pescitelli, 1982a
Daphnia magna	Crustacea	8.07	19.6	51.09	242.4	Russo et al., 1985
Daphnia magna	Crustacea	7.51	20.1	48.32	89.74	Russo et al., 1985
Daphnia magna	Crustacea	7.53	20.1	55.41	106.1	Russo et al., 1985
Daphnia magna	Crustacea	7.5	20.3	43.52	80.98	Russo et al., 1985
Daphnia magna	Crustacea	7.4	20.6	42.31	69.88	Russo et al., 1985
Daphnia magna	Crustacea	8.09	20.9	41.51	227.9	Russo et al., 1985
Daphnia magna	Crustacea	7.95	22	51.3	236.7	Russo et al., 1985
Daphnia magna	Crustacea	8.15	22	37.44	252.8	Russo et al., 1985
Daphnia magna	Crustacea	8.04	22.8	38.7	226.1	Russo et al., 1985
Daphnia pulicaria	Crustacea	8.05	14	34.5	99.03	DeGraeve et al., 1980
Xenopus laevis	Amphibian	7.2	22	38.59	40.91	Schuytema and Nebeker, 1999a
Xenopus laevis	Amphibian	7.2	22	119.6	126.8	Schuytema and Nebeker, 1999a
Xenopus laevis	Amphibian	7.2	24	32.37	39.55	Schuytema and Nebeker, 1999a
Xenopus laevis	Amphibian	7.2	24	60.71	74.17	Schuytema and Nebeker, 1999a
Xenopus laevis	Amphibian	7.15	22	101.4	117.2	Schuytema and Nebeker, 1999a
Xenopus laevis	Amphibian	7.15	22	135.9	157.2	Schuytema and Nebeker, 1999a
Xenopus laevis	Amphibian	7.15	22	128.3	148.4	Schuytema and Nebeker, 1999a
Xenopus laevis	Amphibian	8.43	25	37.3	367.4	Tietge et al., 2000
Xenopus laevis	Amphibian	8.62	25	28.7	405.6	Tietge et al., 2000
Dendrocoelum lacteum	Platyhelminthes	8.2	18	22.37	119.5	Stammer, 1953
Sander vitreus	Fish	7.9	3.7	48.37	172.3	Arthur et al., 1987
Sander vitreus	Fish	7.7	11.1	89.93	224.8	Arthur et al., 1987
Sander vitreus	Fish	8.3	19	6.123	46.87	Arthur et al., 1987
Sander vitreus	Fish	8.06	21.5	21.49	103.4	Mayes et al., 1986
Campostoma anomalum	Fish	7.8	25.7	38.97	115.9	Swigert and Spacie, 1983
Eriocheir sinensis	Crustacea	7.81	22	31.6	112.883	Yan et al., 2010
Cyprinella lutrensis	Fish	8.3	24	24.37	186.5	Hazel et al., 1979
Cyprinella lutrensis	Fish	9.1	24	6.502	206.1	Hazel et al., 1979
Cyprinella spiloptera	Fish	7.95	26.5	18.52	72.39	Rosage et al., 1979
Cyprinella spiloptera	Fish	8.15	26.5	16.27	93.07	Rosage et al., 1979
Cyprinella spiloptera	Fish	7.9	25.7	24.52	87.36	Swigert and Spacie, 1983
Cyprinella whipplei	Fish	7.9	25.7	22.72	80.94	Swigert and Spacie, 1983
Alasmidonta heterodon	Mollusk	8.3	20	14.24	109	Wang et al., 2007b
Potamilus ohiensis	Mollusk	8.3	20	14.24	109	Wang et al., 2007b
Lepomis cyanellus	Fish	7.84	12.3	33.09	105.7	Jude, 1973
Lepomis cyanellus	Fish	7.2	22.4	142.9	174.5	McCormick et al., 1984
Lepomis cyanellus	Fish	6.61	22.4	254.5	197	McCormick et al., 1984
Lepomis cyanellus	Fish	7.72	22.4	55.79	144.3	McCormick et al., 1984
Lepomis cyanellus	Fish	8.69	22.4	9.24	148.6	McCormick et al., 1984
Lepomis gibbosus	Fish	7.77	12	9.11	25.69	Jude, 1973
Lepomis gibbosus	Fish	7.77	14	48.09	135.6	Thurston, 1981
Lepomis gibbosus	Fish	7.77	14.5	42.02	118.5	Thurston, 1981
Lepomis gibbosus	Fish	7.71	15.7	48.54	87.54	Thurston, 1981
Lepomis macrochirus	Fish	8	20	21.56	92.54	Diamond et al., 1993
Lepomis macrochirus	Fish	8	12	25.12	107.9	Diamond et al., 1993
Lepomis macrochirus	Fish	8.11	18.5	16.73	88.57	Emery and Welch, 1969
Lepomis macrochirus	Fish	8.24	18.5	42.01	286.1	Emery and Welch, 1969
Lepomis macrochirus	Fish	8.75	18.5	12.7	227.4	Emery and Welch, 1969
Lepomis macrochirus	Fish	9.05	18.5	6.581	193.8	Emery and Welch, 1969
Lepomis macrochirus	Fish	9.19	18.5	3.755	135	Emery and Welch, 1969
Lepomis macrochirus	Fish	9.62	18.5	0.7859	44.84	Emery and Welch, 1969
Lepomis macrochirus	Fish	9.85	18.5	1.346	89.7	Emery and Welch, 1969
Lepomis macrochirus	Fish	8.6	24	5.509	75.01	Hazel et al., 1979
Lepomis macrochirus	Fish	7.9	24.25	33.06	117.8	Lubinski et al., 1974
Lepomis macrochirus	Fish	8.1	22	19.39	100.7	Mayes et al., 1986
Lepomis macrochirus	Fish	8.4	4	14.64	136.1	Reinbold and Pescitelli, 1982b
Lepomis macrochirus	Fish	8.12	25	23.37	126.2	Reinbold and Pescitelli, 1982b
Lepomis macrochirus	Fish	8.16	4.5	12.55	73.19	Reinbold and Pescitelli, 1982b
Lepomis macrochirus	Fish	8.09	24.8	17.22	87.75	Reinbold and Pescitelli, 1982b
Lepomis macrochirus	Fish	8	22	12.75	54.74	Roseboom and Richey, 1977
Lepomis macrochirus	Fish	8.2	28	14.81	93.31	Roseboom and Richey, 1977
Lepomis macrochirus	Fish	7.93	22	24.08	90.66	Roseboom and Richey, 1977
Lepomis macrochirus	Fish	8.07	22	8.846	43.38	Roseboom and Richey, 1977
Lepomis macrochirus	Fish	7.6	21.7	44.03	93.31	Smith et al., 1984
Lepomis macrochirus	Fish	7.85	22.05	59.93	194.9	Sparks, 1975
Lepomis macrochirus	Fish	7.8	24.2	33.88	100.7	Swigert and Spacie, 1983
Lepomis macrochirus	Fish	7.6	26.5	58.69	124.4	Swigert and Spacie, 1983
Lepomis macrochirus	Fish	7.8	26.6	37.52	111.6	Swigert and Spacie, 1983
Cyprinus carpio	Fish	7.72	28	51.78	133.9	Hasan and MacIntosh, 1986
Cyprinus carpio	Fish	7.72	28	48.97	126.6	Hasan and MacIntosh, 1986
Cyprinus carpio	Fish	7.4	28	45.05	70.78	Rao et al., 1975
Oncorhynchus aguabonita	Fish	8.06	13.2	23.3	112.1	Thurston and Russo, 1981
Oncorhynchus clarkii	Fish	7.7	10	17.3	43.24	Thurston et al., 1981a
Oncorhynchus clarkii	Fish	7.7	10	29.1	72.73	Thurston et al., 1981a
Oncorhynchus clarkii	Fish	7.7	10	19.3	48.24	Thurston et al., 1981a
Oncorhynchus clarkii	Fish	7.7	10	26.3	65.73	Thurston et al., 1981a
Oncorhynchus clarkii	Fish	7.78	12.2	32.57	93.49	Thurston et al., 1978
Oncorhynchus clarkii	Fish	7.8	12.4	36.55	108.7	Thurston et al., 1978
Oncorhynchus clarkii	Fish	7.8	12.8	37.75	112.2	Thurston et al., 1978
Oncorhynchus clarkii	Fish	7.81	13.1	43.72	132.3	Thurston et al., 1978
Oncorhynchus gorbuscha	Fish	6.4	4.3	230.5	164.6	Rice and Bailey, 1980
Oncorhynchus gorbuscha	Fish	6.4	4.3	277.7	198.3	Rice and Bailey, 1980
Oncorhynchus kisutch	Fish	8.1	17.2	11.59	60.2	Buckley, 1978
Oncorhynchus kisutch	Fish	7	15	82.02	82.02	Robinson-Wilson and Seim, 1975
Oncorhynchus kisutch	Fish	7	15	84.43	84.43	Robinson-Wilson and Seim, 1975
Oncorhynchus kisutch	Fish	7.5	15	50.65	91.9	Robinson-Wilson and Seim, 1975
Oncorhynchus kisutch	Fish	7.5	15	52.76	95.73	Robinson-Wilson and Seim, 1975
Oncorhynchus kisutch	Fish	8	15	21.63	92.84	Robinson-Wilson and Seim, 1975
Oncorhynchus kisutch	Fish	8	15	22	94.44	Robinson-Wilson and Seim, 1975
Oncorhynchus kisutch	Fish	8.5	15	9.093	102.5	Robinson-Wilson and Seim, 1975
Oncorhynchus mykiss	Fish	7.7	3.6	38.52	96.27	Arthur et al., 1987
Oncorhynchus mykiss	Fish	7.7	9.8	55.15	137.8	Arthur et al., 1987
Oncorhynchus mykiss	Fish	7.9	16.2	15.23	54.24	Arthur et al., 1987
Oncorhynchus mykiss	Fish	7.9	11.3	30.15	107.4	Arthur et al., 1987
Oncorhynchus mykiss	Fish	8.3	18.7	12.75	97.57	Arthur et al., 1987
Oncorhynchus mykiss	Fish	7.95	10	35.14	137.3	Broderius and Smith Jr., 1979
Oncorhynchus mykiss	Fish	7.4	14.4	40.99	64.4	Calamari et al., 1977
Oncorhynchus mykiss	Fish	8.05	14	22.9	108.1	DeGraeve et al., 1980
Oncorhynchus mykiss	Fish	8.16	14.2	23.39	136.4	Reinbold and Pescitelli, 1982b
Oncorhynchus mykiss	Fish	8.28	12.8	15.4	113.4	Reinbold and Pescitelli, 1982b
Oncorhynchus mykiss	Fish	8.34	5	17.32	143.3	Reinbold and Pescitelli, 1982b
Oncorhynchus mykiss	Fish	8.43	3	11.86	116.8	Reinbold and Pescitelli, 1982b
Oncorhynchus mykiss	Fish	8.5	14.9	10.09	113.7	Reinbold and Pescitelli, 1982b
Oncorhynchus mykiss	Fish	8.6	3.3	15.27	207.9	Reinbold and Pescitelli, 1982b
Oncorhynchus mykiss	Fish	7.44	12.8	32.49	54	Thurston and Russo, 1983
Oncorhynchus mykiss	Fish	7.5	14.5	24.2	43.91	Thurston and Russo, 1983
Oncorhynchus mykiss	Fish	7.59	12.7	32.62	68.03	Thurston and Russo, 1983
Oncorhynchus mykiss	Fish	7.6	13	23.8	50.43	Thurston and Russo, 1983
Oncorhynchus mykiss	Fish	7.6	12.9	25.14	53.27	Thurston and Russo, 1983
Oncorhynchus mykiss	Fish	7.62	7.9	20.53	44.93	Thurston and Russo, 1983
Oncorhynchus mykiss	Fish	7.62	14.4	28.62	62.64	Thurston and Russo, 1983
Oncorhynchus mykiss	Fish	7.63	12.9	25.65	57.06	Thurston and Russo, 1983
Oncorhynchus mykiss	Fish	7.64	9.8	25.82	58.38	Thurston and Russo, 1983
Oncorhynchus mykiss	Fish	7.64	13.1	29.28	66.21	Thurston and Russo, 1983
Oncorhynchus mykiss	Fish	7.64	10	31.85	72.02	Thurston and Russo, 1983
Oncorhynchus mykiss	Fish	7.65	9.8	19.46	44.73	Thurston and Russo, 1983
Oncorhynchus mykiss	Fish	7.65	13.2	28.64	65.84	Thurston and Russo, 1983
Oncorhynchus mykiss	Fish	7.65	14.3	29.02	66.71	Thurston and Russo, 1983
Oncorhynchus mykiss	Fish	7.66	9.8	25.95	60.65	Thurston and Russo, 1983
Oncorhynchus mykiss	Fish	7.66	13.6	28.27	66.07	Thurston and Russo, 1983
Oncorhynchus mykiss	Fish	7.66	12.8	33.97	79.39	Thurston and Russo, 1983
Oncorhynchus mykiss	Fish	7.67	14	27.3	64.87	Thurston and Russo, 1983
Oncorhynchus mykiss	Fish	7.68	13	33.15	80.11	Thurston and Russo, 1983
Oncorhynchus mykiss	Fish	7.69	10.4	17.75	43.62	Thurston and Russo, 1983
Oncorhynchus mykiss	Fish	7.69	10.7	20.18	49.59	Thurston and Russo, 1983
Oncorhynchus mykiss	Fish	7.69	10.7	25.62	62.96	Thurston and Russo, 1983
Oncorhynchus mykiss	Fish	7.69	13.4	27.51	67.6	Thurston and Russo, 1983
Oncorhynchus mykiss	Fish	7.9	12.7	20.03	71.36	Thurston and Russo, 1983
Oncorhynchus mykiss	Fish	7.71	11.5	30.22	76.83	Thurston and Russo, 1983
Oncorhynchus mykiss	Fish	7.71	11.4	32.02	81.4	Thurston and Russo, 1983
Oncorhynchus mykiss	Fish	7.74	10.4	25.76	68.95	Thurston and Russo, 1983
Oncorhynchus mykiss	Fish	7.75	11.8	31.53	85.87	Thurston and Russo, 1983
Oncorhynchus mykiss	Fish	7.75	12.3	33.94	92.43	Thurston and Russo, 1983
Oncorhynchus mykiss	Fish	7.76	10	22.44	62.19	Thurston and Russo, 1983
Oncorhynchus mykiss	Fish	7.77	13.6	31.81	89.71	Thurston and Russo, 1983
Oncorhynchus mykiss	Fish	7.79	12.4	41.97	122.6	Thurston and Russo, 1983
Oncorhynchus mykiss	Fish	7.8	9.7	23.65	70.32	Thurston and Russo, 1983
Oncorhynchus mykiss	Fish	7.8	13.3	42.02	124.9	Thurston and Russo, 1983
Oncorhynchus mykiss	Fish	7.8	12.4	47.87	142.3	Thurston and Russo, 1983
Oncorhynchus mykiss	Fish	7.82	13.2	33.67	103.7	Thurston and Russo, 1983
Oncorhynchus mykiss	Fish	7.83	13.5	33.55	105.2	Thurston and Russo, 1983
Oncorhynchus mykiss	Fish	7.84	12.2	24.54	78.38	Thurston and Russo, 1983
Oncorhynchus mykiss	Fish	7.84	12.9	32.3	103.2	Thurston and Russo, 1983
Oncorhynchus mykiss	Fish	7.84	13.8	33.09	105.7	Thurston and Russo, 1983
Oncorhynchus mykiss	Fish	7.84	13	38.69	123.6	Thurston and Russo, 1983
Oncorhynchus mykiss	Fish	7.85	12.5	29.77	96.81	Thurston and Russo, 1983
Oncorhynchus mykiss	Fish	7.85	13.1	31.55	102.6	Thurston and Russo, 1983
Oncorhynchus mykiss	Fish	7.85	13.1	33.59	109.2	Thurston and Russo, 1983
Oncorhynchus mykiss	Fish	7.85	12.3	33.99	110.5	Thurston and Russo, 1983
Oncorhynchus mykiss	Fish	7.85	16.1	34.17	111.1	Thurston and Russo, 1983
Oncorhynchus mykiss	Fish	7.86	13	20.7	68.55	Thurston and Russo, 1983
Oncorhynchus mykiss	Fish	7.86	13.4	23.71	78.52	Thurston and Russo, 1983
Oncorhynchus mykiss	Fish	7.86	12.7	28.77	95.27	Thurston and Russo, 1983
Oncorhynchus mykiss	Fish	7.86	14.1	34.95	115.7	Thurston and Russo, 1983
Oncorhynchus mykiss	Fish	7.86	10.2	35.31	116.9	Thurston and Russo, 1983
Oncorhynchus mykiss	Fish	7.87	12.9	16.81	56.69	Thurston and Russo, 1983
Oncorhynchus mykiss	Fish	7.87	12.9	18.99	64.04	Thurston and Russo, 1983
Oncorhynchus mykiss	Fish	7.87	13.1	19.08	64.34	Thurston and Russo, 1983
Oncorhynchus mykiss	Fish	7.87	12.2	20.02	67.51	Thurston and Russo, 1983
Oncorhynchus mykiss	Fish	7.87	13	21.15	71.32	Thurston and Russo, 1983
Oncorhynchus mykiss	Fish	7.87	12.1	31.8	107.2	Thurston and Russo, 1983
Oncorhynchus mykiss	Fish	7.87	13	34.32	115.7	Thurston and Russo, 1983
Oncorhynchus mykiss	Fish	7.88	12.8	11.07	38.02	Thurston and Russo, 1983
Oncorhynchus mykiss	Fish	7.88	12.9	15.91	54.64	Thurston and Russo, 1983
Oncorhynchus mykiss	Fish	7.88	13.4	19.43	66.73	Thurston and Russo, 1983
Oncorhynchus mykiss	Fish	7.88	10	28.6	98.22	Thurston and Russo, 1983
Oncorhynchus mykiss	Fish	7.89	12.4	36.73	128.5	Thurston and Russo, 1983
Oncorhynchus mykiss	Fish	7.9	13.4	19.44	69.26	Thurston and Russo, 1983
Oncorhynchus mykiss	Fish	7.7	13.9	28.54	71.33	Thurston and Russo, 1983
Oncorhynchus mykiss	Fish	7.9	11.9	22.65	80.69	Thurston and Russo, 1983
Oncorhynchus mykiss	Fish	7.9	13	35.75	127.4	Thurston and Russo, 1983
Oncorhynchus mykiss	Fish	7.9	13	37.41	133.3	Thurston and Russo, 1983
Oncorhynchus mykiss	Fish	7.91	13.1	12.68	46.01	Thurston and Russo, 1983
Oncorhynchus mykiss	Fish	7.91	13	20.99	76.17	Thurston and Russo, 1983
Oncorhynchus mykiss	Fish	7.91	19	25.36	92.03	Thurston and Russo, 1983
Oncorhynchus mykiss	Fish	7.91	19.1	26.44	95.95	Thurston and Russo, 1983
Oncorhynchus mykiss	Fish	7.94	12.8	26.49	101.6	Thurston and Russo, 1983
Oncorhynchus mykiss	Fish	7.94	12.5	39.25	150.6	Thurston and Russo, 1983
Oncorhynchus mykiss	Fish	7.95	12.5	19.75	77.19	Thurston and Russo, 1983
Oncorhynchus mykiss	Fish	7.96	19.2	23.21	92.42	Thurston and Russo, 1983
Oncorhynchus mykiss	Fish	7.98	12.5	27.02	111.7	Thurston and Russo, 1983
Oncorhynchus mykiss	Fish	8.06	13.2	33.64	161.8	Thurston and Russo, 1983
Oncorhynchus mykiss	Fish	8.08	12.8	23.05	115.2	Thurston and Russo, 1983
Oncorhynchus mykiss	Fish	8.1	13.9	18.14	94.23	Thurston and Russo, 1983
Oncorhynchus mykiss	Fish	8.12	13.6	17.34	93.61	Thurston and Russo, 1983
Oncorhynchus mykiss	Fish	7.62	7.9	21.6	47.27	Thurston et al., 1981a
Oncorhynchus mykiss	Fish	7.67	7.7	17	40.4	Thurston et al., 1981a
Oncorhynchus mykiss	Fish	7.71	8.5	20.7	52.62	Thurston et al., 1981a
Oncorhynchus mykiss	Fish	7.72	8.2	10.5	27.15	Thurston et al., 1981a
Oncorhynchus mykiss	Fish	7.72	8.1	19.8	51.2	Thurston et al., 1981a
Oncorhynchus mykiss	Fish	7.74	8.3	22.3	59.69	Thurston et al., 1981a
Oncorhynchus mykiss	Fish	7.74	8.1	28	74.94	Thurston et al., 1981a
Oncorhynchus mykiss	Fish	7.86	9.6	19.3	63.91	Thurston et al., 1981a
Oncorhynchus mykiss	Fish	7.86	9.7	31.6	104.6	Thurston et al., 1981a
Oncorhynchus mykiss	Fish	7.75	12.7	32.09	87.39	Thurston et al., 1981b
Oncorhynchus mykiss	Fish	7.75	12.5	36.97	100.7	Thurston et al., 1981b
Oncorhynchus mykiss	Fish	7.76	12.5	39.08	108.3	Thurston et al., 1981b
Oncorhynchus mykiss	Fish	7.79	12.9	40.88	119.4	Thurston et al., 1981b
Oncorhynchus mykiss	Fish	7.83	12.8	36.49	114.5	Thurston et al., 1981b
Oncorhynchus mykiss	Fish	6.51	14.1	157.4	116.8	Thurston et al., 1981c
Oncorhynchus mykiss	Fish	6.8	14.1	94.05	80.83	Thurston et al., 1981c
Oncorhynchus mykiss	Fish	7.3	14	74.2	102.2	Thurston et al., 1981c
Oncorhynchus mykiss	Fish	8.29	14.1	13.85	104	Thurston et al., 1981c
Oncorhynchus mykiss	Fish	8.82	13.9	3.95	80.02	Thurston et al., 1981c
Oncorhynchus mykiss	Fish	9.01	14.5	2.51	69.5	Thurston et al., 1981c
Oncorhynchus mykiss	Fish	7.2	10	174	212.6	Wicks and Randall, 2002
Oncorhynchus mykiss	Fish	6.97	16.6	32.38	31.56	Wicks et al., 2002
Oncorhynchus mykiss	Fish	6.97	16.6	207	201.7	Wicks et al., 2002
Oncorhynchus tshawytacha	Fish	7.96	7	28.03	111.6	Servizi and Gordon, 1990
Oncorhynchus tshawytacha	Fish	7.87	13.5	18.47	62.29	Thurston and Meyn, 1984
Oncorhynchus tshawytacha	Fish	7.82	12.2	27.23	83.9	Thurston and Meyn, 1984
Oncorhynchus tshawytacha	Fish	7.84	12.3	24.74	79.02	Thurston and Meyn, 1984
Notropis topeka	Fish	7.85	24.6	21.4	69.59	Adelman et al, 2009
Notropis topeka	Fish	8.05	25	18.7	88.27	Adelman et al, 2009
Notropis topeka	Fish	8.09	13.2	28.9	147.3	Adelman et al, 2009
Rana pipiens	Amphibian	8	20	31.04	133.3	Diamond et al., 1993
Rana pipiens	Amphibian	8	12	16.23	69.69	Diamond et al., 1993
Musculium transversum	Mollusk	8.1	14.6	32.83	109	Arthur et al., 1987
Musculium transversum	Mollusk	8.2	5.4	38.18	71.74	Arthur et al., 1987
Musculium transversum	Mollusk	8.6	20.5	6.429	91.24	Arthur et al., 1987
Micropterus dolomieu	Fish	7.16	22.3	123.4	144.3	Broderius et al, 1985
Micropterus dolomieu	Fish	6.53	22.3	359.9	269.2	Broderius et al, 1985
Micropterus dolomieu	Fish	7.74	22.3	39.3	105.2	Broderius et al, 1985
Micropterus dolomieu	Fish	8.71	22.3	7.56	126	Broderius et al, 1985
Micropterus salmoides	Fish	8.04	28	19.59	90.72	Roseboom and Richey, 1977
Micropterus salmoides	Fish	7.96	22	20.48	81.56	Roseboom and Richey, 1977
Micropterus treculii	Fish	8	22	12.7	54.52	Tomasso and Carmichael, 1986
Lymnaea stagnalis	Mollusk	7.9	11.5	50.33	88.62	Williams et al., 1986
Poecilia reticulata	Fish	7.5	27.55	5.929	10.76	Kumr and Krishnamoorthi, 1983
Poecilia reticulata	Fish	7.22	25	129.4	161.8	Rubin and Elmaraghy, 1976
Poecilia reticulata	Fish	7.45	25	75.65	127.6	Rubin and Elmaraghy, 1976
Poecilia reticulata	Fish	7.45	25	82.95	139.9	Rubin and Elmaraghy, 1976
Etheostoma nigrum	Fish	7.9	20.6	28.9	103	Nimmo et al., 1989
Etheostoma nigrum	Fish	8	20.1	24.61	105.7	Nimmo et al., 1989
Etheostoma nigrum	Fish	8.2	6.2	6.937	43.72	Nimmo et al., 1989
Etheostoma nigrum	Fish	8.1	5.8	11.47	59.57	Nimmo et al., 1989
Etheostoma nigrum	Fish	8.1	5.8	13.46	69.93	Nimmo et al., 1989
Etheostoma nigrum	Fish	8	20.1	15.63	67.08	Nimmo et al., 1989
Etheostoma spectabile	Fish	8.1	22	16.12	83.74	Hazel et al, 1979
Etheostoma spectabile	Fish	8.4	21	7.65	71.12	Hazel et al, 1979
Hybognathus amarus	Fish	8	25	16.9	72.55	Buhl, 2002
Pseudacris crucifer	Amphibian	8	12	17.78	76.33	Diamond et al., 1993
Pseudacris crucifer	Amphibian	8	20	11.42	49.04	Diamond et al., 1993
Pseudacris regilla	Amphibian	6.7	22	41.19	33.36	Schuytema and Nebeker, 1999a
Pseudacris regilla	Amphibian	6.7	22	60.44	48.95	Schuytema and Nebeker, 1999a
Pseudacris regilla	Amphibian	6.7	22	103.1	83.53	Schuytema and Nebeker, 1999a
Pseudacris regilla	Amphibian	7.3	22	136.6	188.1	Schuytema and Nebeker, 1999b
Pseudacris regilla	Amphibian	7.3	22	116.4	160.2	Schuytema and Nebeker, 1999b
Actinonaias ligamentina	Mollusk	8.6	20	6.141	83.61	Wang et al., 2007b
Actinonaias ligamentina	Mollusk	8.4	20	8.099	75.29	Wang et al., 2007b
Actinonaias ligamentina	Mollusk	8.3	20	5.073	38.84	Wang et al., 2007b
Actinonaias ligamentina	Mollusk	8.3	20	8.9	68.13	Wang et al., 2007b
Actinonaias pectorosa	Mollusk	7.9	25	14.06	75.8	Keller, 2000
Actinonaias pectorosa	Mollusk	7.95	25	14.08	83.3	Keller, 2000
Pyganodon grandis	Mollusk	7.71	25	18.84	72.49	Scheller, 1997
Pyganodon grandis	Mollusk	7.5	25	25.13	69.02	Scheller, 1997
Chamistes brevirostris	Fish	8	20	11.42	49.04	Saiki et al., 1999
Chamistes brevirostris	Fish	8	20	22.85	98.09	Saiki et al., 1999
Pleurocera uncialis	Mollusk	8.1	22	11.18	68.54	Goudreau et al., 1993
Notemigonus crysoleucas	Fish	7.5	24.5	34.73	63.02	Swigert and Spacie, 1983
Fluminicola sp.	Mollusk	8.25	20.2	8.801	62.15	Besser, 2011
Corbicula fluminea	Mollusk	8.05	29.4	6.316	64.9781	Yan et al., 2010
Corbicula fluminea	Mollusk	8.05	30.3	2.125	23.555	Yan et al., 2010
Corbicula fluminea	Mollusk	7	25	83.82	126.862	Liu et al., 2014a
Deltistes luxatus	Fish	8	20	16.81	72.18	Saiki et al., 1999
Deltistes luxatus	Fish	8	20	10.35	44.42	Saiki et al., 1999
Prosopium williamsoni	Fish	7.68	12.1	11.3	27.31	Thurston and Meyn, 1984
Prosopium williamsoni	Fish	7.84	12.4	25.47	81.35	Thurston and Meyn, 1984
Prosopium williamsoni	Fish	7.8	12.3	21.2	63.04	Thurston and Meyn, 1984
Echyridella menziesii	Mollusk	7.8	20	16.09	47.84	Clearwater et al., 2014
Fusconaia masoni	Mollusk	7.6	24.9	15.9	47.4	Black, 2001
Siniperca chuatsi	Fish	7.91	25	9.779	35.48	Gao et al., 1999
Siniperca chuatsi	Fish	7.82	20	13.18	40.6078	Wang et al., 1996
Siniperca chuatsi	Fish	7.44	19	17.58	29.2176	Guo et al., 2009
Utterbackia imbecillis	Mollusk	7.9	24	8.235	40.87	Keller, 2000
Utterbackia imbecillis	Mollusk	8.35	25	3.269	41.75	Keller, 2000
Utterbackia imbecillis	Mollusk	7.9	25	9.355	50.45	Keller, 2000
Utterbackia imbecillis	Mollusk	7.8	24	14.29	59.19	Wade et al., 1992
Utterbackia imbecillis	Mollusk	8.16	25	5.254	46.38	Black, 2001
Utterbackia imbecillis	Mollusk	8.17	25	5.781	52.03	Black, 2001
Utterbackia imbecillis	Mollusk	8.29	25	8.845	100.5	Black, 2001
Utterbackia imbecillis	Mollusk	8	25.1	2.734	17.91	Black, 2001
Utterbackia imbecillis	Mollusk	8.02	25	7.395	49.9	Black, 2001
Lampsilis abrupta	Mollusk	8.4	20	2.8	26.03	Wang et al., 2007a
Lampsilis cardium	Mollusk	7.6	21.2	23.1	54.07	Newton and Bartsch, 2007
Lampsilis cardium	Mollusk	7.1	21.2	38.9	47.19	Newton and Bartsch, 2007
Lampsilis fasciola	Mollusk	7.83	12.6	14.9	25.31	Mummert et al., 2003
Lampsilis fasciola	Mollusk	8.5	20	6.179	69.63	Wang et al., 2007b
Lampsilis fasciola	Mollusk	8.3	20	7.743	59.28	Wang et al., 2007b
Lampsilis fasciola	Mollusk	8.4	20	5.518	51.3	Wang et al., 2007b
Lampsilis higginsii	Mollusk	7.6	21.2	19.5	45.64	Newton and Bartsch, 2007
Lampsilis higginsii	Mollusk	7.1	21.2	31.7	38.46	Newton and Bartsch, 2007
Lampsilis rafinesqueana	Mollusk	8.3	20	9.185	70.31	Wang et al., 2007b
Lampsilis rafinesqueana	Mollusk	8.4	20	9.269	86.17	Wang et al., 2007b
Lampsilis rafinesqueana	Mollusk	8.3	20	7.387	56.55	Wang et al., 2007b
Lampsilis siliquoidea	Mollusk	8.35	20	8.8	74.25	Miao et al., 2010
Lampsilis siliquoidea	Mollusk	8.2	20	4.6	28.99	Wang et al., 2007a
Lampsilis siliquoidea	Mollusk	7.6	20.5	11	24.3	Wang et al., 2008
Lampsilis siliquoidea	Mollusk	8.1	20.6	5.2	28.39	Wang et al., 2008
Lampsilis siliquoidea	Mollusk	8.5	20.6	3.4	40.27	Wang et al., 2008
Lampsilis siliquoidea	Mollusk	9	20.6	0.96	27.51	Wang et al., 2008
Lampsilis siliquoidea	Mollusk	6.6	19.6	88	65.59	Wang et al., 2008
Lampsilis siliquoidea	Mollusk	8.1	19.4	11	54.37	Wang et al., 2008
Lampsilis siliquoidea	Mollusk	8.4	20	9.79	91.01	Wang et al., 2007b
Lampsilis siliquoidea	Mollusk	8.2	20	13.35	84.14	Wang et al., 2007b
Lampsilis siliquoidea	Mollusk	8.4	20	11.57	107.6	Wang et al., 2007b
Lampsilis siliquoidea	Mollusk	8.5	20	14.24	160.5	Wang et al., 2007b
Lampsilis siliquoidea	Mollusk	8.3	20	6.497	49.74	Wang et al., 2007b
Lampsilis siliquoidea	Mollusk	8.3	20	8.772	66.77	Wang et al., 2007b
Acipenser sinensis	Fish	8	20	10.4	44.64	Yan et al., 2010
Acipenser schrencki	Fish	7.6	22	5.3	11.23	Liu et al., 2014b
Acipenser brevirostrum	Fish	7.05	18	149.8	156.7	Fontenot et al., 1998
Villosa iris	Mollusk	8.4	20	2.505	23.29	Wang et al., 2007b
Villosa iris	Mollusk	8.3	20	8.935	68.4	Wang et al., 2007b
Villosa iris	Mollusk	8.18	25	7.81	71.66	Scheller, 1997
Villosa iris	Mollusk	8.1	20	5.261	27.33	Wang et al., 2007b
Villosa iris	Mollusk	7.29	12.6	20.6	15.17	Mummert et al., 2003
Villosa iris	Mollusk	8.18	25	7.07	64.87	Scheller, 1997
Villosa iris	Mollusk	7.94	20	3.29	12.62	Scheller, 1997
Villosa iris	Mollusk	8.4	20	10.68	99.28	Wang et al., 2007b
Villosa iris	Mollusk	8.1	22	3.57	21.89	Goudreau et al., 1993
Villosa iris	Mollusk	8.1	22	4.278	26.23	Goudreau et al., 1993
Epioblasma capsaeformis	Mollusk	8.5	20	4.76	53.63	Wang et al., 2007b
Epioblasma capsaeformis	Mollusk	8.5	20	5	17.81	Wang et al., 2007b
Epioblasma capsaeformis	Mollusk	8.5	20	3.4	31.61	Wang et al., 2007b
Lasmigona subviridis	Mollusk	7.73	24	6.613	24.24	Black, 2001
Lasmigona subviridis	Mollusk	7.92	24.8	3.969	21.84	Black, 2001
Venustaconcha ellipsiformis	Mollusk	8.1	20	4.55	23.12	Wang et al., 2007b

## Sheet: Talbe S2
GMAV Rank	GMAV (mg TAN/L)	Species	Species category	SMAV (mg TAN/L)	ACR used in the calculation of GMCV (Column H)	the ACR values	ACR-based GMCV = GMAV/ACR	Publication-based GMCV	Total GMCV
1	23	Lasmigona subviridis	Mollusk	23	FMACR	15.52	1.482	/	1.482
2	23.12	Venustaconcha ellipsiformis	Mollusk	23.12	FMACR	15.52	1.48969	/	1.48969
3	31.14	Epioblasma capsaeformis	Mollusk	31.14	FMACR	15.52	2.00644	/	2.00644
4	34.23	Villosa iris	Mollusk	34.23	/	/	/	3.501	3.501
5	42.83	Acipenser schrencki	Fish	11.23	CMACR	9.506	4.50558	/	4.50558
		Acipenser sinensis		44.64				/
		Acipenser brevirostrum		156.7				/
6	46.63	Lampsilis abrupta	Mollusk	26.03	/	/	/	2.126	2.126
		Lampsilis cardium		50.51
		Lampsilis fasciola		48.11
		Lampsilis higginsii		41.9
		Lampsilis rafinesqueana		69.97
		Lampsilis siliquoidea		55.42
7	46.93	Utterbackia imbecillis	Mollusk	46.93	FMACR	15.52	3.02384	/	3.02384
8	34.79	Siniperca chuatsi	Fish	46.97	CMACR	9.506	3.66	/	3.66
9	47.4	Fusconaia masoni	Mollusk	47.4	FMACR	15.52	3.05412	/	3.05412
10	47.84	Echyridella menziesii	Mollusk	47.84	FMACR	15.52	3.08247	/	3.08247
11	51.93	Prosopium williamsoni	Fish	51.93	FMACR	7.047	7.36909	/	7.36909
12	56.62	Deltistes luxatus	Fish	56.62	FMACR	14.75	3.83864	/	3.83864
13	57.91	Corbicula fluminea	Mollusk	57.91	CMACR	25.68	2.25506	/	2.25506
14	62.15	Fluminicola sp.	Mollusk	62.15	/	/	/	7.828	7.828
15	63.02	Notemigonus crysoleucas	Fish	63.02	FMACR	10.96	5.75	/	5.75
16	68.54	Pleurocera uncialis	Mollusk	68.54	CMACR	7.94	8.63224	/	8.63224
17	69.36	Chasmistes brevirostris	Fish	69.36	FMACR	14.75	4.70237	/	4.70237
18	70.73	Pyganodon grandis	Mollusk	70.73	FMACR	15.52	4.55735	/	4.55735
19	71.25	Actinonaias ligamentina	Mollusk	63.89	FMACR	15.52	4.59085	/	4.59085
		Actinonaias pectorosa		79.46				/
20	71.56	Pseudacris crucifer	Amphibian	61.18	PMACR	9.506	7.52788	/	7.52788
		Pseudacris regilla		83.71				/
21	72.55	Hybognathus amarus	Fish	72.55	FMACR	10.96	6.61953	/	6.61953
22	74.25	Etheostoma nigrum	Fish	71.45	CMACR	9.506	7.81086	/	7.81086
		Etheostoma spectabile		77.17				/
23	74.66	Poecilia reticulata	Fish	74.66	CMACR	9.506	7.85399	/	7.85399
24	88.62	Lymnaea stagnalis	Mollusk	88.62	CMACR	25.68	3.45093	/	3.45093
25	89.06	Micropterus dolomieu	Fish	150.6	/	/	/	11.07	11.07
		Micropterus salmoides		86.02
		Micropterus treculii		54.52
26	89.36	Musculium transversum	Mollusk	89.36	/	/	/	7.547	7.547
27	96.38	Rana pipiens	Amphibian	96.38	PMACR	9.506	10.1389	/	10.1389
28	96.72	Notropis topeka	Fish	96.72	SMACR	8.437	11.4638	/	11.4638
29	99.15	Oncorhynchus aguabonita	Fish	112.1	/	/	/	12.02	12.02
		Oncorhynchus clarkii		78.92
		Oncorhynchus gorbuscha		180.7
		Oncorhynchus kisutch		87.05
		Oncorhynchus mykiss		82.88
		Oncorhynchus tshawytscha		82.39
30	106.3	Cyprinus carpio	Fish	106.3	/	/	/	16.53	16.53
31	106.9	Lepomis cyanellus	Fish	150.8	/	/	/	6.92	6.92
		Lepomis gibbosus		77.53
		Lepomis macrochirus		104.5
32	109	Potamilus ohiensis	Mollusk	109	FMACR	15.52	7.0232	/	7.0232
33	109	Alasmidonta heterodon	Mollusk	109	FMACR	15.52	7.0232	/	7.0232
34	110	Cyprinella lutrensis	Fish	196.1	FMACR	10.96	10.0365	/	10.0365
		Cyprinella spiloptera		83.8				/
		Cyprinella whipplei		80.94				/
35	112.9	Eriocheir sinensis	Crustacea	112.9	CMACR	11.6	9.73276	/	9.73276
36	115.9	Campostoma anomalum	Fish	115.9	FMACR	10.96	10.5748	/	10.5748
37	117.1	Sander vitreus	Fish	117.1	CMACR	9.506	12.3185	/	12.3185
38	119.5	Dendrocoelum lacteum	Platyhelminthes	119.5	FACR	11.63	10.2752	/	10.2752
39	122.5	Xenopus laevis	Amphibian	122.5	PMACR	9.506	12.8866	/	12.8866
40	125	Daphnia magna	Crustacea	157.7	/	/	/	41.46	41.46
		Daphnia pulicaria		99.03
41	136.3	Oreochromis niloticus	Fish	136.3	CMACR	9.506	14.3383	/	14.3383
42	136.7	Salmo salar	Fish	183.3	FMACR	7.047	19.3983	/	19.3983
		Salmo trutta		102				/
43	138	Procambarus clarkii	Crustacea	138	CMACR	11.6	11.8966	/	11.8966
44	142.4	Ictalurus punctatus	Fish	142.4	/	/	/	21.36	21.36
45	142.9	Simocephalus vetulus	Crustacea	142.9	FMACR	8.507	16.7979	/	16.7979
46	143.9	Ceriodaphnia acanthine	Crustacea	154.3	FMACR	8.507	16.9155	/	16.9155
		Ceriodaphnia dubia		134.2				/
47	146.5	Catostomus commersonii	Fish	157.5	/	/	/	11.62	11.62
		Catostomus platyrhynchus		136.2
48	157.8	Salvelinus fontinalis	Fish	156.3	FMACR	7.047	22.3925	/	22.3925
		Salvelinus namaycush		159.3				/
49	159.2	Pimephales promelas	Fish	159.2	/	/	/	9.187	9.187
50	162.6	Chydorus sphaericus	Crustacea	162.6	CMACR	11.6	14.0172	/	14.0172
51	164	Enallagma sp.	Insect	164	PMACR	11.6	14.1379	/	14.1379
52	164.5	Physa gyrina	Mollusk	164.5	CMACR	7.94	20.7179	/	20.7179
53	167.6	Morone americana	Fish	132.7	CMACR	9.506	17.631	/	17.631
		Morone chrysops		144				/
		Morone saxatilis		246.2				/
54	170.2	Limnodrilus hoffmeisteri	Annelid	170.2	FACR	11.63	14.6346	/	14.6346
55	181.8	Crangonyx pseudogracilis	Crustacea	270.5	CMACR	15.81	11.4991	/	11.4991
		Crangonyx sp.		122.2				/
56	185.2	Oreochromis mossambicus	Fish	185.2	CMACR	9.506	19.4824	/	19.4824
57	192.4	Skwala americana	Insect	192.4	PMACR	11.06	17.396	/	17.396
58	192.6	Hyalella azteca	Crustacea	192.6	/	/	/	29.17	29.17
59	202	Gobiocypris rarus	Fish	202	FMACR	10.96	18.4307	/	18.4307
60	211.6	Planorbella trivolvis	Mollusk	211.6	CMACR	7.94	26.6499	/	26.6499
61	239.8	Anguilla anguilla	Fish	213.3	CMACR	9.506	25.226	/	25.226
62	216.5	Tubifex tubifex	Annelid	216.5	FACR	11.63	18.6156	/	18.6156
63	218.7	Lumbriculus variegatus	Annelid	218.7	FACR	11.63	18.8048	/	18.8048
64	219.3	Gambusia affinis	Insect	219.3	PMACR	11.6	18.9052	/	18.9052
65	222.2	Cottus bairdii	Fish	222.2	CMACR	9.506	23.3747	/	23.3747
66	233	Pachydiplax longipennis	Insect	233	PMACR	11.6	20.0862	/	20.0862
67	246.5	Callibaetis skokianus	Insect	364.6	PMACR	11.6	21.25	/	21.25
		Callibaetis sp.		166.7				/
68	281.5	Gasterosteus aculeatus	Fish	281.5	CMACR	9.506	29.6129	/	29.6129
69	387	Caecidotea racovitzai	Crustacea	387	CMACR	11.6	33.3621	/	33.3621
70	442.4	Drunella grandis	Insect	442.4	PMACR	11.6	38.1379	/	38.1379
71	681.8	Chironomus riparius	Insect	1029	PMACR	11.6	58.7759	/	58.7759
		Chironomus tentans		451.8				/
72	686.2	Orconectes immunis	Crustacea	1550	CMACR	11.6	59.1552	/	59.1552
		Orconectes nais		303.8				/
73	735.9	Stenelmis sexlineata	Insect	735.9	PMACR	11.6	63.4397	/	63.4397
74	994.5	Philarctus quaeris	Insect	994.5	PMACR	11.6	85.7328	/	85.7328
75	2515	Erythromma najas	Insect	2515	PMACR	11.6	216.81	/	216.81
76	3478	Monopterus albus	Fish	3478	CMACR	9.506	365.874	/	365.874
/	/	Esox lucius	Fish	/	/	/	/	20.38	20.38
/	/	Pteronarcella badia	insect	/	/	/	/	73.74	73.74
/	/	Ctenopharyngodon idellus	Fish	/	/	/	/	18.5	18.5

## Sheet: Table S3
Species	Endpoint	Normalized value	Reference	SACR	SMACR	GMACR	FMACR	CMACR	PMACR	Final ACR
Fluminicola sp.	LC50	62.15	Besser, 2011	7.94	7.94	7.940 Genus Fluminicola	7.940 Family Lithoglyphidae	7.940 Class Gastropoda	14.28 Phylum Mollusk	11.63
	EC20-Growth	7.828
Lampsilis fasciola	LC50	69.63	Wang et al., 2007b	49.45	49.45	21.13 Genus Lampsilis	15.52 Family Unionidae	25.68 Class Bivalvia
	EC20-Survival	1.408	Wang et al., 2007a
Lampsilis siliquoidea	LC50	28.99	Wang et al., 2007a	9.028	9.028
	EC20-Survival	3.211	Wang et al., 2011
Villosa iris	EC50	23.29	Wang et al., 2007b	11.4	11.4	11.40 Genus Villosa
	EC50	68.4
	EC20-Survival	3.501	Wang et al., 2007a
Musculium transversum	EC50	109	Arthur et al., 1987	42.5	42.5	42.50 Genus Musculium	42.50 Family Pasidiidae
	EC20-Survival	2.565	Sparks and Sandusky, 1981
Daphnia magna	EC50	296.9	Gersich and Hopkins, 1986	8.186	8.507	8.507 Genus Daphnia	8.507 Family Daphniidae	11.60 Class Crustacea	11.60 Phylum Arthropoda
	EC20-Reproduction	36.27	Gersich et al., 1985
	EC50	419.1	Reinbold and Pescitelli, 1982a	8.841
	EC20-Reproduction	47.4
Hyalella azteca	EC50	461.2	Ankley et al., 1995	15.81	15.81	15.81 Genus Hyalella	15.81 Family Gammaridae
	EC20-Biomass	29.17	Borgmann, 1994
Oncorhynchus clarkii	LC50	132.3	Thurston et al., 1978	5.122	5.122	7.047 Genus Oncorhynchus	7.047 Family Salmonidae	9.506 Class Osteichthyes	9.506 Phylum Chordata
	EC20-Survival	25.83	Koch et al., 1980
Oncorhynchus mykiss	LC50	31.47	Calamari et al., 1981	9.696	9.696
	EC20-Survival	3.246
Catostomus commersoni	LC50	176.6	Reinbold and Pescitelli, 1982c	14.75	14.75	14.75 Genus Catostomus	14.75 Family Catostomidae
	LC50	166.3
	EC20-Biomass	11.62	Reinbold and Pescitelli, 1982a
Notropis topeka	LC50	147.3	Adelman et al., 2009	8.437	8.437	8.437 Genus Notropis	10.96 Family Cyprinidae
	EC20-Growth rate	17.45
Pimephales promelas	LC50	139.3	Thurston et al., 1983	36.53	19.24	19.24 Genus Pimephales
	LC50	158.7
	LC50	178.9
	LC50	162.3
	LC50	205
	LC50	216.3
	EC20-LC Hatchability	4.784	Thurston et al., 1986
	LC50	141.2	Mayes et al., 1986	11.35
	EC20-Survival	12.43
	LC50	117.3	Swigert and Spacie, 1983	17.17
	LC50	126.8
	EC20-Biomass	7.101
Cyprinus carpio	LC50	133.9	Hasan and MacIntosh, 1986	8.1	8.1	8.100 Genus Cyprinus
	EC20-Growth	16.53	Mallet and Sims, 1994
Ictalurus punctatus	LC50	97.67	Swigert and Spacie, 1983	4.8	4.8	4.800 Genus Ictalurus	4.800 Family Amblycipitidae
	EC20-Biomass	20.35
Lepomis cyanellus	LC50	144.3	McCormick et al., 1984	12.18	6.468	13.58 Genus Lepomis	14.20 Family Centrarchidae
	EC20-Biomass	11.85
	LC50	62.07	Reinbold and Pescitelli, 1982a	3.437
	EC20-Survival	18.06
Lepomis macrochirus	LC50	93.31	Smith et al., 1984	28.51	28.51
	EC20-Biomass	3.273
Micropterus dolomieui	LC50	144.3	Broderius et al., 1985	14.84	14.84	14.84 Genus Micropterus
	EC20-Biomass	9.726
